# Supplementary material for: Activity of methanogenic biomass after heat and freeze drying in air
Source: Royal Society of Chemistry journal article supplement (doi:10.1039/c7ew00049a), 2017-01-01
Supplement: c7ew00049a1.pdf [file c7ew00049a1.pdf]

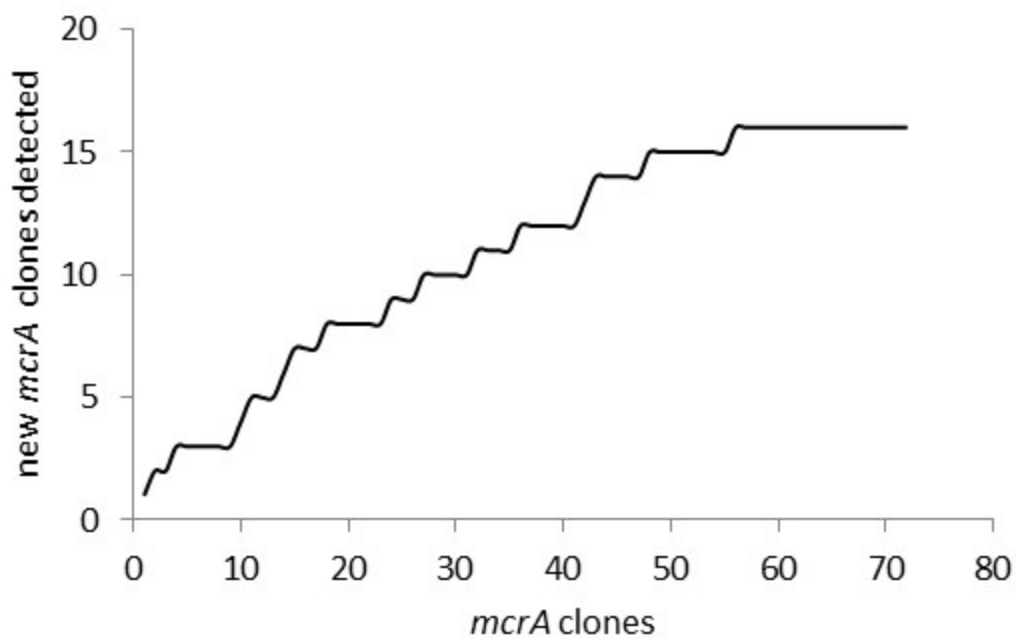

**Figure S1. Rarefaction curve for *mcrA* clone library of non-dried methanogenic culture.**

**Table S1. Methanogenic gene and genus specific primers.**

| <b>Target Organisms</b>                        | <b>Amplicon<br/>Size</b> | <b>Primer Sequence</b>                                                   |
|------------------------------------------------|--------------------------|--------------------------------------------------------------------------|
| <b><i>mcrA</i> gene-specific primer</b>        |                          |                                                                          |
| Methanogens<br>(Luton et al., 2002)            | 470bp                    | F-5'-<br>GTGGTGTMGGATTCACACARTAYGCWACAGC<br>R-5'-TTCATTGCRTAGTTWGGRTAGTT |
| <b><i>16S rRNA</i> genus specific primers</b>  |                          |                                                                          |
| <i>Methanospirillum</i><br>(Rowe et al., 2008) | 122bp                    | F-5'-AGTAACACGTGGACAATCTGCCCT<br>R-5'-ACTCATCCTGAAGCGACGGATCTT           |
| <i>Methanoculleus</i><br>(Franke et al., 2009) | 262bp                    | F-5'-GGAGCAAGAGCCCGGAGT<br>R'-5'-CCAAGAGACTTAACAACCC                     |
| <i>Methanosaeta</i><br>(Rowe et al., 2008)     | 266bp                    | F-5'-GGGGTAGGGGTGAAATCTTGTAATCCT<br>R-5'-CGGCGTTGAATCCAATTAAACCGCA       |
| <i>Methanosarcina</i><br>(Franke et al., 2009) | 325bp                    | F-5'-CCTATCAGGTAGTAGTGGGTGTAAT<br>R-5'-CCCGGAGGACTGACCAA                 |
